# Supplementary material for: Antiangiogenesis Roles of Exosomes with Fei-Liu-Ping Ointment Treatment are Involved in the Lung Carcinoma with the Lewis Xenograft Mouse Model
Source: Evid Based Complement Alternat Med. 2020 Apr 5;2020:9418593. doi: 10.1155/2020/9418593 (PMC7142396; doi:10.1155/2020/9418593)
Supplement: Supplementary Materials — Identification of compounds in FLP ointment. [file 9418593.f1.xls]

## Sheet: Sheet1
N.O.	tR	Precursor ion (m/z)	Elem. Comp.	Diff. (ppm)	Fragment ions (m/z)	Diff. (ppm)	Identification
1	1.27	[M+Na]+	C12H22O11Na	-2.061	347.0941(27)	-2.241	Maltose
		365.105			275.0377(25)	-1.703
					203.0524(100)	-1.178
					185.0417(28)	-1.592
2	1.27	[M+Na]+	C18H32O16Na	-1.946	467.1360(5)	-0.811	D-Melezitose
		527.157			437.1255(9)	-2.315
					365.1047(100)	-1.979
					347.0942(20)	-1.982
3	1.27	[M+Na]+	C18H30O15Na	-1.829	491.1365(10)	-1.255	beta-Glucan
		509.147			347.0945(100)	-1.031
					328.1500(30)	2.257
					185.0418(1)	-1.538
4	1.35	[M+H]+	C12H21N2O7	-3.269	287.1235(100)	-1.02	2'-Deoxymugineic acid
		305.133			269.1130(34)	-0.699
					227.1025(44)	-0.676
5	2.59	[M+H]+	C6H9O4	-1.898	127.0389(100)	-0.556	Monoethyl fumarate
		145.049			99.0439(74)	-1.373
6	3.21	[M+H]+	C6H7O3	-2.13	109.0283(100)	-1.063	5-hydroxymethylfurfural
		127.039			81.0322(3)	-3.349
7	4.35	[M+H]+	C9H7O3	-2.15	109.0283(100)	-1.339	umbelliferone
		163.037			81.0332(2)	-3.595
8	13.74	[M+Na]+	C20H24O10Na	3.337	429.1149(1)	-1.569	Praeroside II
		447.128			357.0938(1)	-1.86
					285.0754(100)	-1.193
9	13.74	[M+Na]+	C22H22O10Na	-2.298	307.0573(100)	-1.448	Calycosin-7-O-beta-D-glucoside
		469.109
10	15.31	[M+Na]+	C19H20O12Na	3.332	287.0545(100)	-1.688	4-O-(E)-caffeoyl-5-O-malonylquinic acid
		463.086
11	15.84	[M+Na]+	C21H40O11Na	-1.879	473.2343(12)	-2.976	2,6-Dimethyl-4-heptyl-β-D-maltopyranoside
		491.245			359.2033(100)	-2.073
					275.0732(9)	-2.14
12	17.76	[M+Na]+	C19H20O11Na	-1.695	271.0598(100)	-1.291	6-O-galloylarbutin
		447.091			153.0180(1)	-1.733
13	18.18	[M+H]+	C41H71O13	-1.541	-	-	Ginsenoside F3
		771.488
14	18.29	[M+H]+	C36H63O9	-2.486	621.4344(100)	-2.647	ginsenoside F1
		639.445			603.4237(8)	-3.017
					441.3716(30)	-2.554
					423.3610(60)	-2.652
					405.3504(17)	-2.832
15	18.4	[M+H]+	C36H61O8	-2.261	-	-	Ginsenoside Rh4
		621.435
16	19.47	[M+H]+	C36H63O9	-1.814	621.4344(100)	-2.647	Ginsenoside Rh1
		639.446			603.4236(9)	-3.117
					441.3715(35)	-2.758
					423.3611(61)	-2.581
					405.3503(20)	-3.202
17	19.47	[M+H]+	C42H73O13	-2.162	-	-	ginsenoside F2
		785.503
18	19.79	[M+H]+	C21H23O9	-1.81	257.0804(100)	-1.538	liquiritin
		419.133
19	19.9	[M+H]+	C24H25O11		285.0753(100)	-1.508	kaempferide, 7-O-(4-O-acethyl-α-L-rhamnopyranosyl)
		489.138
20	20.01	[M+H]+	C22H23O9	-2.038	269.0805(100)	-1.098	ononin
		431.133
21	20.97	[M+Na]+	C21H36O10Na	-1.249	339.1775(100)	-1.031	Geranyl b-primeveroside
		471.219			335.0945(40)	-1.247
					275.0734(7)	-1.267
22	20.97	[M+Na]+	C42H72O14Na	-1.017	-	-	ginsenoside Rg1
		823.481
23	21.19	[M+Na]+	C48H82O18Na	-1.853	-	-	ginsenoside Re
		969.538
24	21.94	[M+Na]+	C23H26O10Na	-1.707	323.0882(100)	-2.553	Astrapterocarpan
		485.141
25	22.15	[M+H]+	C16H13O5	-1.824	270.0520(100)	-1.129	calycosin
		285.075			253.0493(44)	-1.088
					225.0543(16)	-1.336
					137.0232(9)	-1.172
26	22.25	[M+H]+	C9H11O3	-1.86	139.0389(100)	-0.652	(R)-(-)-Methyl mandelate
		167.07			121.0283(2)	-1.206
					95.0489(1)	-2.855
27	22.56	[M+H]+	C28H33O14	-2.094	447.1279(100)	-1.439	luteolin-7-O-rutinoside
		539.185			285.0753(15)	-1.508
28	22.77	[M+H]+	C48H78O22	-1.161	845.4505(22)	-2.871	Aesculuside B
		1007.5			683.3981(100)	-2.888
					521.3456(77)	-3.146
					503.3352(59)	-2.932
					485.3247(75)	-2.907
					455.3142(38)	-3.023
29	22.99	[M+Na]+	C23H28O10Na	-1.946	472.1329(20)	-2.252	7,2'-dihydroxy-3',4'-dimethoxyisoflavane-7-O-glucoside
		487.156			443.2241(100)	-2.4
					325.1038(19)	-2.537
					185.0416(11)	-2.187
30	24.7	[M+H]+	C52H85O24	-2.277	961.4794(33)	-3.007	deapioplatycodin D
		1093.54			799.4437(48)	2.696
					667.4025(100)	-4.074
					521.3452(65)	-3.971
					503.3347(68)	-3.905
					485.3242(74)	-3.979
31	25.35	[M+H]+	C42H69O17	-1.498	683.3978(48)	-3.327	Saniculosid A
		845.452			521.3456(84)	-3.146
					503.3352(86)	-2.932
					485.3246(100)	-3.093
					455.3141(42)	-3.155
32	25.88	[M+H]+	C36H63O9	-1.626	621.4344(100)	-2.744	sanchinoside B1
		639.446			603.4236(9)	-3.233
					441.3716(33)	-2.554
					423.3610(62)	-2.793
					405.3504(18)	-2.906
33	27.17	[M+H]+	C47H79O19	-1.495	-	-	astragaloside VI
		947.52
34	27.81	[M+H]+	C42H73O14	-2.399	783.4863(33)	-3.304	ginsenoside Rg1
		801.498			457.3360(69)	-3.612
					439.3554(100)	-3.749
					421.3451(56)	-3.329
35	28.55	[M+H]+	C42H63O18	-1.802	679.3666(6)	-3.185	22-hydroxyl-licorice-saponin G2
		855.399			661.3560(17)	-3.446
					643.3457(21)	-3.069
					503.3354(75)	-2.514
					485.3249(100)	-2.536
					467.3142(15)	-2.881
36	28.55	[M+H]+	C30H45O5	-1.774	405.3510(100)	-1.475	(R)-4,4,6a,6b,8a,11,11,14b-Octamethyl-1,2,3,4,4a,5,6,6a,6b,8a,9,10,11,12,12a,14b-hexadecahydro-picen-3-ol
		423.322
37	28.77	[M+H]+	C36H59O12	-1.366	521.3459(38)	-2.552	3-O-β-Glucosyl-platycodigenin
		683.399			503.3355(88)	-2.455
					485.3250(100)	-2.351
					455.3145(35)	-2.298
38	28.98	[M+H]+	C18H19O5	-1.905	297.1117(100)	-1.6	Agdmonolide
		315.122			279.1020(31)	-1.436
					207.0648(14)	-1.716
					189.0544(14)	-1.432
					121.0640(24)	-1.747
39	28.98	[M+H]+	C24H29O10	-2.208	459.1638(66)	-2.48	agrimonolide-6-O-glucopyranoside
		477.175			423.1428(29)	-2.527
					357.1324(79)	-2.45
					315.1220(100)	-2.19
40	29.19	[M+Na]+	C54H92O23Na	-1.723	789.4739(100)	-2.62	Ginsenoside Rb1
		1131.59			365.1044(30)	-2.91
41	29.4	[M+H]+	C16H13O4	-1.469	254.0571(100)	-0.867	formononetin
		269.08			237.0544(38)	-1.015
					213.0908(39)	-0.921
					107.0489(12)
42	30.45	[M+Na]+	C41H68O14Na	-1.88	627.3848(100)	-3.004	astragaloside III
		807.449			495.3427(2)	-3.576
43	31.4	[M+H]+	C42H63O17	-1.569	663.3718(10)	-3.194	22-hydroxyl-glycyrrhizin
		839.407			645.3615(20)	-2.904
					627.3510(16)	-2.789
					487.3406(100)	-2.505
					469.3300(92)	-2.528
					451.3195(12)	-2.552
44	31.82	[M+Na]+	C43H70O15Na	-2.734	789.4372(13)	-3.006	Isoastragalosides II
		849.458			669.3957(100)	-2.412
					609.3741(5)	-3.438
					477.3325(3)	-3.051
45	32.34	[M+H]+	C46H63O16	-1.618	647.3768(27)	-3.312	glycyrrhizinic acid
		823.41			471.3450(5)	-4.066
					453.3349(100)	-3.07
					407.3299(3)	-2.412
46	32.34	[M+H]+	C36H54O10	-2.092	471.3456(3)	-2.772	glycyrrhizinic acid 3-O-glucuronide
		647.378			453.3354(100)	-1.923
					435.3246(1)	-2.543
					407.3302(1)	-1.504
47	33.07	[M+H]+	C42H73O13	-1.704	767.4911(100)	-3.719	ginsenoside Rg3
		785.503			749.4803(25)	-4.202
					443.3873(7)	-2.452
					425.3762(32)	-3.697
					407.3658(49)	-3.628
48	35.26	[M+H]+	C36H55O10	-1.706	471.3456(3)	-2.835	Monoglucuronyl glycyrrehetic acid
		647.378			453.3354(100)	-1.923
					435.3249(1)	-1.992
					407.3299(1)	-2.412
49	35.26	[M+Na]+	C45H72O16Na	-1.926	-	-	isoastragaloside I
		891.47
50	38.36	[M+H]+	C30H49O	-1.605	407.3668(100)	-1.002	pachysandienol-A
		425.377			271.2478(13)	-0.986
					217.1948(15)	-1.185
					189.1636(13)	-0.831
51	38.36	[M+Na]+	C42H70O12Na	-2	627.4213(7)	-2.861	ginsenoside Rg5
		789.474			365.1047(100)	-1.979
					245.0626(5)	-2.505
52	39.72	[M+H]+	C17H25O3	-1.05	235.1691(100)	-0.623	cyclandelate
		277.18			177.1272(1)	-1.195
					161.0959(1)	-0.879
53	40.23	[M+H]+	C30H47O4	-1.159	425.3409(100)	-1.239	glycyrrhetinate
		471.346			407.3302(72)	-1.504
					317.2107(64)	-1.454
					235.1689(72)	-1.388
					189.1636(68)	-1.096
